# Supplementary material for: Enhancement of Rose Scented Geranium Plant Growth, Secondary Metabolites, and Essential Oil Components through Foliar Applications of Iron (Nano, Sulfur and Chelate) in Alkaline Soils
Source: MDPI journal article supplement (doi:10.3390/agronomy12092164), 2022-09-11
Supplement: s1 [file s1]

**Table S1.** Mean of monthly climatic data of the experimental site throughout the experimental seasons

| Parameters  | Year | January | February | March | April | May   | June  | July  | August | September | October | November | December |
|-------------|------|---------|----------|-------|-------|-------|-------|-------|--------|-----------|---------|----------|----------|
| T2M_MAX     | 2018 | 24.25   | 29.22    | 35.9  | 37.15 | 42.3  | 42.58 | 43.15 | 40.07  | 38.67     | 34.78   | 32.02    | 24.99    |
| T2M_MAX     | 2019 | 25.11   | 31.51    | 31.18 | 35.67 | 46.4  | 40.82 | 41.39 | 42.69  | 38.05     | 35.92   | 33.3     | 25.72    |
| T2M_MIN     | 2018 | 7.29    | 8.33     | 10.23 | 12.83 | 16.03 | 18.33 | 21.27 | 22.5   | 21.14     | 17.04   | 12.29    | 7.38     |
| T2M_MIN     | 2019 | 4.56    | 6.01     | 7.71  | 9.31  | 14.48 | 19.02 | 21.14 | 21.96  | 19.87     | 16.76   | 12.03    | 7.02     |
| RH2M        | 2018 | 69.69   | 65.94    | 53.25 | 54.81 | 50.12 | 47.94 | 51.5  | 55.56  | 56.44     | 57.25   | 62.56    | 66.44    |
| RH2M        | 2019 | 56.94   | 62.38    | 62.62 | 56.5  | 47.94 | 50.81 | 50.25 | 51.25  | 56.75     | 62.5    | 59.94    | 64.88    |
| WS2M        | 2018 | 3.37    | 2.34     | 2.8   | 3.02  | 3.4   | 3.3   | 3.2   | 3.14   | 2.88      | 2.94    | 2.28     | 3.15     |
| WS2M        | 2019 | 3.38    | 2.95     | 3.28  | 3.26  | 3.5   | 3.31  | 3.09  | 2.88   | 2.89      | 2.76    | 2.77     | 3.26     |
| PRECTOTCORR | 2018 | 0.91    | 0.22     | 0.07  | 0.23  | 0     | 0     | 0.18  | 0      | 0         | 0.15    | 0.46     | 0.48     |
| PRECTOTCORR | 2019 | 0.28    | 0.3      | 0.68  | 0.12  | 0     | 0     | 0     | 0      | 0         | 0.32    | 0.01     | 0.73     |

Where RH2MRelative humidity at 2 meters (%); WS2M, Wind Speed at 2 Meters (m/s); T2M-MAX, Temperature at 2 Meters maximum (0C); T2M-MIN, Temperature at 2 Meters Minimum (C); PREC-TOTCORR, Precipitation Corrected (mm/day).
